# Supplementary material
Source: PubMed Central journal article supplement (PMC6785008)
Supplement: 41386_2019_402_MOESM1_ESM.pdf [file 41386_2019_402_MOESM1_ESM.pdf]

**Supplementary Figure 1: Effects of MDMA, MA, and placebo on a) pleasantness ratings, b) zygomatic reactivity, and c) corrugator reactivity to CT-optimal and non-optimal observed touch.** Statistical analysis was conducted on MDMA vs. placebo and MA vs. placebo separately, but doses are depicted together for the sake of clarity.
